# Supplementary material for: Oral antibiotics combined with mechanical bowel preparation reduces the risk of surgical site infections in minimally invasive colorectal cancer surgery
Source: Research Square preprint supplement (doi:10.21203/rs.3.rs-5823484/v1), 2025-01-20
Supplement: Supplementary file 1 [file 16c6c9834f567590ce6bd64a.docx]

|  | **Colon cohort** | | | |  | | **Rectum cohort** | | | |  | |
| --- | --- | --- | --- | --- | --- | --- | --- | --- | --- | --- | --- | --- |
|  | | **Total**  **(N=1032)** | **MBP+POA**  **(N=450)** | **MBP only**  **(N=582)** | | ***p*** | | **Total (N=474)** | **MBP+POA (N=245)** | **MBP only (N=229)** | | ***p*** |
| Male, n (%) | | 556 (53.9) | 244 (54.2) | 312 (53.6) | | *0.85* | | 264 (55.7) | 140 (57.1) | 124 (54.1) | | *0.519* |
| Female, n (%) | | 476 (46.1) | 206 (45.8) | 270 (46.4) | | 210 (44.3) | 105 (42.9) | 105 (45.9) | |
| Age, median (IQR) | | 64 (56-73) | 64 (56-73) | 64(56-73) | | *0.77* | | 63 (54-71) | 63 (54-71) | 62 (53-71) | | *0.884* |
| BMI, kg/m2, mean (SD) | | 23.6 (3.3) | 23.7 (3.3) | 23.8 (3.2) | | *0.17* | | 23.30 (3.34) | 23.22 (3.28) | 23.39 (3.41) | | *0.443* |
| ASA class, n (%) | |  |  |  | | *0.06* | |  |  |  | | *0.681* |
| 1 | | 38 (3.7) | 11 (2.4) | 27 (4.6) | |  | | 25 (5.3) | 10 (4.1) | 15 (6.6) | |  |
| 2 | | 618 (59.9) | 258 (57.3) | 360 (61.9) | |  | | 296 (62.4) | 154 (62.9) | 142 (62.0) | |  |
| 3 | | 365 (35.4) | 176 (39.1) | 189 (32.5) | |  | | 145 (30.6) | 77 (31.4) | 68 (29.7) | |  |
| 4 | | 11 (1.1) | 5 (1.1) | 6 (1.0) | |  | | 8 (1.7) | 4 (1.6) | 4 (1.7) | |  |
| Operation method, n (%) | |  |  |  | | *>0.99* | |  |  |  | | *<0.001** |
| Laparoscopic | | 360 (34.9) | 157 (34.9) | 203 (34.9) | |  | | 159 (64.9) | 191 (83.4) | 350 (73.8) | |  |
| Robotic | | 672 (65.1) | 293 (65.1) | 379 (65.1) | |  | | 86 (35.1) | 38 (16.6) | 124 (26.2) | |  |

Title: Oral antibiotics combined with mechanical bowel preparation reduces the risk of surgical site infections in minimally invasive colorectal cancer surgery

Authors: Eun Ji Park1,2, Min Young Park1; Yoon Dae Han1; Min Soo Cho1; Hyuk Hur1; Kang Young Lee1; Byung Soh Min1, Seung Yoon Yang1

1Division of Colorectal Surgery, Department of Surgery, Yonsei University College of Medicine, Seoul, Korea
3Division of Colorectal Surgery, Department of Surgery, Kyung Hee University College of Medicine, Seoul, Korea

Corresponding author: Seung Yoon Yang

Email: syyy2000@yuhs.ac

* *P* values ≤ 0.05

**Supplement table 1.** Baseline characteristics of colon and rectal cancer cohorts, further compared between oral antibiotics use in mechanical bowel preparation.

Abbreviations: N, number; MBP, mechanical bowel preparation; POA, preoperative oral antibiotics; IQR, interquartile range; BMI, body mass index; SD, standard deviation
