# Supplementary material for: Oral antibiotics combined with mechanical bowel preparation reduces the risk of surgical site infections in minimally invasive colorectal cancer surgery
Source: Research Square preprint supplement (doi:10.21203/rs.3.rs-5823484/v1), 2025-01-20
Supplement: Supplementary file 2 [file f39acee2d91418051a6d84ac.docx]

|  | **Colon cohort** | | | |  | | **Rectum cohort** | | | |  | |
| --- | --- | --- | --- | --- | --- | --- | --- | --- | --- | --- | --- | --- |
|  | | **Total**  **(N=1032)** | **MBP+POA**  **(N=450)** | **MBP only**  **(N=582)** | | ***p*** | | **Total (N=474)** | **MBP+POA (N=245)** | **MBP only (N=229)** | | ***p*** |
| Operation time (min), mean (SD) | | 168.9 ± 57.4 | 164.7 ± 54.7 | 181.9 ± 60.9 | | *<0.001** | | 185±60 | 185±60 | 186±59 | | *0.925* |
| EBL (ml), median (IQR) | | 10 (0-30) | 10 (0-30) | 20 (0-50) | | *0.28* | | 20 (0-50) | 20 (0-50) | 20 (10-50) | | *0.865* |
| Postoperative HD (days), median (IQR) | | 5 (5-7) | 5 (5-6) | 6 (5-7) | | *0.34* | | 6 (5-7) | 6 (5-6) | 6 (5-7) | | *0.583* |
| Surgical site infection, n (%) | | 115 (11.1) | 36 (8.0) | 79 (13.6) | | *0.005** | | 30 (12.2) | 30 (13.1) | 60 (12.7) | | *0.784* |
| Grade 1-2, n (%) | | 87 (8.4) | 29 (6.4) | 58 (10.0) | | *0.05** | | 10 (4.1) | 17 (7.4) | 27 (5.7) | | *0.164* |
| Grade 3, n (%) | | 32 (3.1) | 10 (2.2) | 22 (3.8) | | *0.20* | | 20 (8.2) | 15 (6.6) | 35 (7.4) | | *0.599* |
| SSI Gr 3 without AL, n (%) | | 15 (1.5) | 5 (1.1) | 10 (1.7) | | *0.60* | | 4 (1.6) | 11 (4.8) | 15 (3.2) | | *0.065* |
| Complication, n (%) | | 177 (17.2) | 58 (12.9) | 119 (20.4) | | *0.002** | | 81 (17.1) | 42 (17.1) | 39 (17.0) | | *>0.99* |
| Anastomosis leakage, n (%) | | 19 (1.8) | 6 (1.3) | 13 (2.2) | | *0.35* | | 22 (4.6) | 17 (6.9) | 5(2.2) | | *0.016** |

Title: Oral antibiotics combined with mechanical bowel preparation reduces the risk of surgical site infections in minimally invasive colorectal cancer surgery

Authors: Eun Ji Park1,2, Min Young Park1; Yoon Dae Han1; Min Soo Cho1; Hyuk Hur1; Kang Young Lee1; Byung Soh Min1, Seung Yoon Yang1

1Division of Colorectal Surgery, Department of Surgery, Yonsei University College of Medicine, Seoul, Korea
3Division of Colorectal Surgery, Department of Surgery, Kyung Hee University College of Medicine, Seoul, Korea

Corresponding author: Seung Yoon Yang

Email: syyy2000@yuhs.ac

* *P* values ≤ 0.05

Supplement table 2. Perioperative outcomes in colon and rectum cohorts, compared between mechanical bowel preparation only and preoperative oral antibiotics groups.

Abbreviations: N, number; MBP, mechanical bowel preparation; POA, preoperative oral antibiotics; SD, standard deviation; min, minutes; EBL, estimated blood loss; IQR, interquartile range; HD, hospital days; SSI, surgical site infections; Gr, grade; AL, anastomosis leakage
